# Supplementary material for: Postoperative Thyroid-Stimulating Hormone Levels Did Not Affect Recurrence after Thyroid Lobectomy in Patients with Papillary Thyroid Cancer
Source: PubMed Central journal article supplement — Endocrinol Metab (Seoul). 2019 May 10;34(2):150–7. doi: 10.3803/EnM.2019.34.2.150 (PMC6599911; doi:10.3803/enm.2019.34.2.150), 2019-05-10
Supplement: enm-34-150-s001.pdf [file enm-34-150-s001.pdf]

**Supplemental Table S1.** Cox Regression Analysis with Known Risk Factors for Recurrence-Free Survival

| Variable                          | Recurrence     | HR      | 95% CI    | P value |
|-----------------------------------|----------------|---------|-----------|---------|
| Age, yr                           |                |         |           |         |
| <45                               | 12/642 (1.9)   | 1 (Ref) |           |         |
| ≥45                               | 9/886 (1.0)    | 0.62    | 0.25–1.50 | 0.29    |
| Sex                               |                |         |           |         |
| Female                            | 19/1,351 (1.4) | 1 (Ref) |           |         |
| Male                              | 2/177 (1.1)    | 0.89    | 0.20–3.83 | 0.87    |
| Subtypes                          |                |         |           |         |
| Conventional                      | 18/1,365 (1.3) | 1 (Ref) |           |         |
| Follicular                        | 2/152 (1.3)    | 0.98    | 0.22–4.25 | 0.98    |
| Tumor size, cm                    |                |         |           |         |
| ≤1                                | 13/1,335 (1.0) | 1 (Ref) |           |         |
| >1                                | 8/193 (4.1)    | 2.92    | 1.18–7.27 | 0.02    |
| Multiplicity                      |                |         |           |         |
| No                                | 17/1,331 (1.3) | 1 (Ref) |           |         |
| Yes                               | 4/197 (2.0)    | 1.92    | 0.64–5.75 | 0.24    |
| ETE                               |                |         |           |         |
| No                                | 15/1,004 (1.5) | 1 (Ref) |           |         |
| Yes                               | 6/510 (1.2)    | 0.81    | 0.31–2.11 | 0.66    |
| LN metastasis                     |                |         |           |         |
| No                                | 17/1,323 (1.3) | 1 (Ref) |           |         |
| Yes                               | 4/205 (2.0)    | 1.87    | 0.62–5.63 | 0.26    |
| Nodules in the contralateral lobe |                |         |           |         |
| No                                | 12/1,089 (1.1) | 1 (Ref) |           |         |
| Yes                               | 5/427 (1.2)    | 1.22    | 0.43–3.48 | 0.70    |

Values are expressed as number/total number (%).

HR, hazard ratio; CI, confidence interval; ETE, extrathyroidal extension; LN, lymph node.
