# Supplementary material for: Postoperative Thyroid-Stimulating Hormone Levels Did Not Affect Recurrence after Thyroid Lobectomy in Patients with Papillary Thyroid Cancer
Source: PubMed Central journal article supplement — Endocrinol Metab (Seoul). 2019 May 10;34(2):150–7. doi: 10.3803/EnM.2019.34.2.150 (PMC6599911; doi:10.3803/enm.2019.34.2.150), 2019-05-10
Supplement: enm-34-150-s002.pdf [file enm-34-150-s002.pdf]

**Supplemental Table S2.** Cox Regression Analysis for Recurrence-Free Survival According to the Thyroid-Stimulating Hormone Levels

| Mean TSH <sub>5yrs</sub>    | Total    | Recurrence | HR (95% CI)      |
|-----------------------------|----------|------------|------------------|
| <b>Tumor size ≤ 1 cm</b>    |          |            |                  |
| <0.5                        | 87 (7)   | 0          | 0.00             |
| 0.5–1.9                     | 481 (36) | 9 (1.9)    | 1 (Ref)          |
| 2.0–4.4                     | 632 (47) | 3 (0.5)    | 0.35 (0.09–1.30) |
| ≥4.5                        | 135 (10) | 1 (0.7)    | 0.50 (0.06–4.00) |
| <b>Tumor size &gt; 1 cm</b> |          |            |                  |
| <0.5                        | 28 (15)  | 5 (18)     | 0.64 (0.09–4.53) |
| 0.5–1.9                     | 69 (36)  | 2 (3)      | 1 (Ref)          |
| 2.0–4.4                     | 82 (42)  | 1 (1)      | 0.33 (0.02–3.81) |
| ≥4.5                        | 14 (7)   | 0          | 0.00             |
| <b>No LN metastasis</b>     |          |            |                  |
| <0.5                        | 98 (7)   | 4 (4)      | 0.48 (0.12–1.89) |
| 0.5–1.9                     | 455 (34) | 9 (2)      | 1 (Ref)          |
| 2.0–4.4                     | 637 (48) | 3 (1)      | 0.33 (0.09–1.25) |
| ≥4.5                        | 133 (10) | 1 (1)      | 0.39 (0.04–3.13) |
| <b>LN metastasis</b>        |          |            |                  |
| <0.5                        | 17 (8)   | 1 (6)      | 0.00             |
| 0.5–1.9                     | 95 (46)  | 2 (2)      | 1 (Ref)          |
| 2.0–4.4                     | 77 (38)  | 1 (1)      | 0.95 (0.08–10.6) |
| ≥4.5                        | 16 (8)   | 0          | 0.00             |

Values are expressed as number/total number (%).

TSH<sub>5yrs</sub>, TSH levels for 5 years after surgery; HR, hazard ratio; CI, confidence interval; LN, lymph node.
